# Supplementary material for: The Role of Nonshivering Thermogenesis Genes on Leptin Levels Regulation in Residents of the Coldest Region of Siberia
Source: MDPI journal article supplement (doi:10.3390/ijms22094657), 2021-04-28
Supplement: s1 [file s1]

## Supplementary Material

**Table S1.** Anthropometric characteristics and results of genotyping and ELISA analysis in 281 individuals of Yakuts

| No | #DNA | Gen der | Heig ht, cm | Weigh t, kg | BMI, kg/m <sup>2</sup> | Age, year s | Lept in, ng/ml | <i>UCP1</i> rs180059 2 | <i>UCP1</i> rs381178 7 | <i>UCP2</i> rs65936 6 | <i>UCP2</i> rs66033 9 | <i>UCP3</i> rs180084 9 | <i>UCP3</i> rs207557 7 | <i>FNDC5</i> rs1683519 8 | <i>FNDC</i> 5 rs3480 | <i>LEPR</i> rs113710 1 | <i>PTGS2</i> rs68946 6 | <i>TRPV1</i> rs15084 6 | <i>BDN F</i> rs626 5 | <i>CIDEA</i> rs809250 2 | <i>PPARGC1 A</i> rs12650562 |
|----|------|---------|-------------|-------------|------------------------|-------------|----------------|------------------------|------------------------|-----------------------|-----------------------|------------------------|------------------------|--------------------------|----------------------|------------------------|------------------------|------------------------|----------------------|-------------------------|-----------------------------|
| 1  | 201  | F       | 168         | 55          | 19.49                  | 18          | 17.9           | AA                     | TT                     | CT                    | GA                    | TT                     | AA                     | GG                       | GA                   | GG                     | CT                     | CC                     | GA                   | TT                      | CT                          |
| 2  | 203  | F       | 160         | 45          | 17.58                  | 21          | 2.78           | AA                     | TT                     | CT                    | GA                    | TT                     | AA                     | GT                       | GA                   | GG                     | TT                     | CC                     | GG                   | CT                      | CT                          |
| 3  | 204  | F       | 167         | 62          | 22.23                  | 18          | 34.1           | AA                     | TT                     | CT                    | GA                    | CT                     | GA                     | TT                       | AA                   | GG                     | TT                     | CT                     | GG                   | TT                      | TT                          |
| 4  | 205  | F       | 152         | 48          | 20.78                  | 19          | 10.8           | AA                     | GT                     | CC                    | GG                    | CT                     | GA                     | GG                       | GG                   | GG                     | TT                     | CC                     | GG                   | TT                      | CC                          |
| 5  | 206  | F       | 155         | 51          | 21.23                  | 19          | 3              | GA                     | GT                     | CT                    | GA                    | CT                     | AA                     | GG                       | AA                   | GG                     | TT                     | CC                     | GG                   | CT                      | CT                          |
| 6  | 207  | F       | 165         | 65          | 23.88                  | 18          | 46.5           | GA                     | TT                     | CT                    | GG                    | CT                     | GA                     | GT                       | GA                   | AA                     | TT                     | CT                     | GG                   | CT                      | CT                          |
| 7  | 208  | F       | 160         | 56          | 21.88                  | 18          | 46             | GA                     | TT                     | CC                    | GG                    | TT                     | AA                     | GT                       | AA                   | GG                     | TT                     | CT                     | GG                   | TT                      | CC                          |
| 8  | 210  | F       | 168         | 61          | 21.61                  | 17          | 18             | GA                     | GT                     | CT                    | GA                    | CT                     | GA                     | GG                       | GA                   | GG                     | TT                     | TT                     | GG                   | CT                      | CT                          |
| 9  | 211  | F       | 173         | 58          | 19.38                  | 19          | 17             | GG                     | GT                     | TT                    | AA                    | CC                     | GA                     | GG                       | GG                   | GG                     | CT                     | CT                     | GG                   | CT                      | CT                          |
| 10 | 213  | F       | 176         | 110         | 35.51                  | 18          | 38.7           | GG                     | GT                     | TT                    | AA                    | CC                     | GA                     | GT                       | AA                   | GG                     | TT                     | CT                     | GG                   | CT                      | TT                          |
| 11 | 214  | F       | 169         | 55          | 19.26                  | 19          | 11             | GA                     | GG                     | CT                    | GA                    | CT                     | GA                     | TT                       | AA                   | GG                     | CT                     | CT                     | GA                   | CT                      | CC                          |
| 12 | 216  | F       | 157         | 55          | 22.31                  | 19          | 31.7           | AA                     | GG                     | CT                    | GG                    | CT                     | GA                     | GT                       | GA                   | GG                     | TT                     | CT                     | GG                   | TT                      | CC                          |
| 13 | 217  | F       | 165         | 65          | 23.88                  | 18          | 12.8           | GA                     | GG                     | TT                    | AA                    | TT                     | AA                     | GG                       | AA                   | GA                     | CT                     | CT                     | GG                   | TT                      | CC                          |
| 14 | 219  | F       | 158         | 60          | 24.03                  | 19          | 25.4           | GG                     | GG                     | TT                    | AA                    | TT                     | AA                     | GT                       | AA                   | GG                     | CT                     | CC                     | GG                   | TT                      | CT                          |
| 15 | 220  | F       | 160         | 60          | 23.44                  | 19          | 32.9           | AA                     | GT                     | CT                    | GA                    | TT                     | GA                     | GG                       | GA                   | GG                     | TT                     | TT                     | GA                   | CT                      | CC                          |
| 16 | 223  | F       | 161         | 57          | 21.99                  | 18          | 31.4           | AA                     | TT                     | CT                    | GA                    | TT                     | AA                     | GG                       | GA                   | GG                     | CT                     | CC                     | GG                   | TT                      | CC                          |
| 17 | 226  | F       | 159         | 54          | 21.36                  | 21          | 22             | AA                     | TT                     | TT                    | AA                    | TT                     | AA                     | GT                       | AA                   | GA                     | CC                     | CC                     | GG                   | TT                      | CC                          |
| 18 | 227  | F       | 174         | 75          | 24.77                  | 19          | 26.6           | GA                     | GT                     | CT                    | GA                    | CC                     | GG                     | GT                       | GA                   | GG                     | TT                     | CC                     | GG                   | CT                      | CT                          |
| 19 | 228  | F       | 164         | 51          | 18.96                  | 20          | 9.6            | AA                     | GT                     | CT                    | GA                    | TT                     | AA                     | GT                       | GA                   | GA                     | TT                     | CT                     | GG                   | CC                      | CT                          |
| 20 | 232  | F       | 158         | 52          | 20.83                  | 18          | 23.2           | AA                     | TT                     | CT                    | GA                    | CC                     | GG                     | GT                       | AA                   | GG                     | TT                     | TT                     | GA                   | CT                      | CC                          |
| 21 | 233  | F       | 168         | 48          | 17.01                  | 18          | 10.6           | AA                     | TT                     | TT                    | AA                    | CC                     | GA                     | GG                       | GA                   | GA                     | TT                     | TT                     | GA                   | CT                      | CT                          |
| 22 | 234  | F       | 160         | 57          | 22.27                  | 19          | 17.7           | AA                     | GT                     | TT                    | AA                    | CT                     | AA                     | GG                       | GG                   | GG                     | TT                     | CC                     | GG                   | CT                      | CT                          |
| 23 | 236  | F       | 150         | 45          | 20.00                  | 19          | 15.4           | GA                     | GT                     | TT                    | AA                    | TT                     | AA                     | GT                       | GA                   | GG                     | TT                     | CT                     | GG                   | TT                      | CT                          |

|    |     |   |     |    |       |    |      |    |    |    |    |    |    |    |    |    |    |    |    |    |    |
|----|-----|---|-----|----|-------|----|------|----|----|----|----|----|----|----|----|----|----|----|----|----|----|
| 24 | 238 | F | 151 | 48 | 21.05 | 19 | 9.19 | GA | GT | CC | GG | TT | AA | GT | GA | GA | TT | CC | GG | CT | CC |
| 25 | 239 | F | 160 | 53 | 20.70 | 19 | 7.84 | AA | TT | TT | AA | CC | AA | GT | AA | GG | CT | CC | GA | TT | CC |
| 26 | 240 | F | 165 | 45 | 16.53 | 19 | 15.9 | GA | GT | CT | GA | TT | AA | TT | AA | GA | TT | CT | GA | CT | CC |
| 27 | 242 | F | 157 | 43 | 17.44 | 19 | 32.7 | GA | GG | CC | GG | CT | GA | GG | AA | GG | TT | CC | GG | TT | CC |
| 28 | 243 | F | 160 | 54 | 21.09 | 19 | 22.6 | GA | GT | CT | GA | TT | AA | GG | GA | GG | CT | CC | GA | CT | CC |
| 29 | 244 | F | 164 | 57 | 21.19 | 18 | 19.5 | GA | GT | CT | GA | TT | AA | GG | GA | GG | TT | CT | GG | CT | CT |
| 30 | 245 | M | 173 | 52 | 17.37 | 19 | 7.57 | GA | TT | CT | GA | CT | AA | TT | AA | GG | CT | CT | GG | TT | CC |
| 31 | 246 | F | 166 | 64 | 23.23 | 18 | 10.8 | GA | GG | CT | GA | CT | AA | GG | GA | GG | TT | CT | GG | CT | CT |
| 32 | 247 | F | 154 | 50 | 21.08 | 19 | 11   | AA | TT | CT | GA | CT | GA | GT | AA | GA | TT | CC | GG | TT | TT |
| 33 | 249 | F | 157 | 55 | 22.31 | 18 | 37.5 | GG | GG | CT | GA | CC | AA | GT | GA | GA | CT | CT | GG | TT | CT |
| 34 | 250 | F | 155 | 54 | 22.48 | 19 | 17.8 | GA | GT | TT | AA | TT | AA | GT | AA | GG | TT | TT | GG | TT | CT |
| 35 | 251 | F | 168 | 60 | 21.26 | 20 | 15.1 | AA | TT | CT | GA | CT | AA | GT | AA | GA | CT | TT | GG | CT | CC |
| 36 | 252 | F | 164 | 56 | 20.82 | 19 | 9.93 | GG | GG | CT | GA | TT | AA | GT | AA | GG | TT | CC | GA | TT | CC |
| 37 | 254 | F | 164 | 56 | 20.82 | 19 | 21.6 | AA | GT | CC | GG | CT | GG | GT | AA | GG | CT | CT | GA | CT | CC |
| 38 | 256 | F | 170 | 58 | 20.07 | 18 | 28   | GA | GT | CT | AA | TT | AA | GT | GA | GA | TT | CC | GG | CC | CT |
| 39 | 257 | F | 156 | 52 | 21.37 | 19 | 28.1 | GA | GT | CT | GG | TT | AA | GG | GA | GG | CT | CC | GG | TT | CT |
| 40 | 259 | M | 165 | 49 | 18.00 | 18 | 6.54 | GA | GT | CT | GA | TT | AA | GG | GA | GG | TT | CT | GG | TT | TT |
| 41 | 260 | M | 170 | 47 | 16.26 | 18 | 6.12 | GA | GT | CT | GA | TT | AA | GT | AA | GA | TT | CC | GA | TT | CT |
| 42 | 261 | F | 168 | 54 | 19.13 | 19 | 8.53 | GA | GT | TT | AA | TT | AA | GG | GA | GG | TT | CC | GG | CT | CT |
| 43 | 262 | F | 161 | 54 | 20.83 | 19 | 11.9 | GA | GT | TT | AA | CT | AA | GT | GA | GA | TT | CC | GG | TT | CC |
| 44 | 265 | F | 159 | 54 | 21.36 | 20 | 5.13 | AA | TT | CT | GA | TT | GA | GG | GA | GA | TT | CT | GG | TT | TT |
| 45 | 266 | F | 156 | 45 | 18.49 | 18 | 11.3 | AA | GT | CT | GA | CT | GA | GT | GA | GG | TT | CT | GG | TT | CT |
| 46 | 267 | F | 157 | 44 | 17.85 | 19 | 13.2 | GA | GT | CT | GA | CT | GA | GG | GA | GG | TT | CC | GG | CT | CT |
| 47 | 268 | F | 155 | 48 | 19.98 | 19 | 15.8 | AA | TT | TT | AA | TT | AA | GT | GA | GA | CT | CT | GG | TT | CT |
| 48 | 269 | F | 151 | 37 | 16.23 | 19 | 14.3 | AA | TT | CT | GA | CT | GA | TT | AA | GA | TT | CT | GA | TT | CC |
| 49 | 270 | F | 151 | 48 | 21.05 | 19 | 21.1 | GA | GT | CT | GG | TT | AA | GG | GG | GG | CT | CC | GG | TT | CC |
| 50 | 272 | F | 167 | 57 | 20.44 | 20 | 57.9 | GA | GT | TT | AA | TT | AA | GT | GA | GA | CT | CT | GA | CT | CT |
| 51 | 274 | F | 150 | 50 | 22.22 | 19 | 13.2 | AA | GT | TT | AA | CT | GA | GG | GA | GG | TT | TT | GA | TT | CC |
| 52 | 276 | F | 160 | 59 | 23.05 | 19 | 19.3 | GA | GT | CC | GG | CT | GA | GG | GG | GG | TT | TT | GG | TT | CT |
| 53 | 277 | F | 170 | 62 | 21.45 | 17 | 14.1 | GA | TT | CT | GG | CC | GA | TT | AA | GG | CT | CC | GA | TT | CC |
| 54 | 279 | F | 170 | 68 | 23.53 | 17 | 13.8 | GA | GT | CT | GA | CT | GA | GT | AA | GA | TT | CC | GG | TT | CT |

|    |     |   |     |    |       |    |      |    |    |    |    |    |    |    |    |    |    |    |    |    |    |
|----|-----|---|-----|----|-------|----|------|----|----|----|----|----|----|----|----|----|----|----|----|----|----|
| 55 | 281 | F | 157 | 60 | 24.34 | 18 | 40.1 | AA | TT | CT | GA | CT | GA | GG | AA | GA | TT | CC | GG | CC | CC |
| 56 | 284 | F | 158 | 55 | 22.03 | 18 | 21.2 | AA | TT | CT | GA | CC | GG | GT | GA | GA | CT | CT | GG | CC | CC |
| 57 | 285 | F | 157 | 67 | 27.18 | 20 | 47.5 | GG | GT | TT | AA | TT | AA | GG | AA | GG | TT | CT | GG | CC | CT |
| 58 | 286 | M | 172 | 84 | 28.39 | 24 | 10.5 | AA | GT | TT | AA | CT | GA | GT | AA | GG | CT | CC | GG | TT | CT |
| 59 | 287 | F | 173 | 74 | 24.73 | 17 | 13.6 | GG | GT | CC | GG | CT | GA | GG | AA | GG | TT | CT | GA | CT | TT |
| 60 | 290 | F | 164 | 80 | 29.74 | 20 | 57.4 | AA | GT | CC | GG | CC | GG | GG | GA | GG | CT | CT | GG | TT | CC |
| 61 | 292 | F | 157 | 47 | 19.07 | 19 | 7.29 | GA | GT | CC | GG | CC | GG | TT | AA | GG | CT | CT | GA | CT | TT |
| 62 | 293 | M | 175 | 90 | 29.39 | 19 | 62.2 | AA | TT | CT | GA | CC | GA | GT | AA | GG | CT | CT | GG | TT | CT |
| 63 | 294 | F | 165 | 52 | 19.10 | 24 | 10.2 | AA | TT | TT | AA | CT | AA | GT | GA | GA | TT | CT | GA | CT | CC |
| 64 | 295 | F | 160 | 64 | 25.00 | 23 | 21.6 | GA | TT | CC | GG | CT | GA | GT | AA | GA | CT | CT | AA | CC | TT |
| 65 | 296 | F | 161 | 60 | 23.15 | 18 | 11.5 | GA | GT | CC | GG | CT | GA | GG | GA | GG | CT | CC | GA | TT | CT |
| 66 | 297 | F | 160 | 56 | 21.88 | 18 | 20.3 | AA | TT | TT | AA | TT | AA | GG | AA | GG | TT | TT | GG | CT | CC |
| 67 | 298 | M | 166 | 70 | 25.40 | 20 | 25.7 | GA | TT | TT | AA | TT | AA | GT | AA | GG | CT | CT | GA | CT | CC |
| 68 | 299 | F | 168 | 55 | 19.49 | 19 | 11.8 | GA | GG | TT | AA | CT | AA | GG | GG | GG | CC | CT | GG | TT | CT |
| 69 | 300 | F | 164 | 60 | 22.31 | 21 | 21.1 | GA | GG | CC | GG | CC | AA | GT | GA | GA | TT | CT | GG | TT | CT |
| 70 | 302 | F | 164 | 52 | 19.33 | 20 | 9.54 | GA | GG | CC | GG | CT | GA | TT | GA | GG | TT | CT | GG | CC | CC |
| 71 | 303 | F | 170 | 60 | 20.76 | 19 | 15.4 | GA | GT | TT | AA | CT | AA | GT | AA | GG | TT | CC | GA | CT | CC |
| 72 | 306 | F | 168 | 53 | 18.78 | 23 | 23.7 | GA | GT | TT | AA | CT | GA | GT | GA | GG | TT | CT | GG | CT | CT |
| 73 | 307 | F | 160 | 59 | 23.05 | 19 | 18.8 | GA | GT | CT | GG | CT | GA | GT | GA | GG | CT | CT | GG | CC | CT |
| 74 | 308 | F | 171 | 57 | 19.49 | 19 | 6.95 | GG | GT | CT | GG | CC | GG | GT | AA | GG | TT | CT | GA | TT | CC |
| 75 | 310 | F | 160 | 47 | 18.36 | 18 | 10   | GA | GT | CC | GG | CC | GG | GG | GA | GG | TT | CT | GG | TT | CT |
| 76 | 312 | F | 155 | 55 | 22.89 | 19 | 12.9 | GG | GG | CC | GG | CT | GA | GT | GA | GG | TT | CC | GG | CT | CT |
| 77 | 313 | F | 165 | 48 | 17.63 | 19 | 8.53 | GA | GT | TT | GA | TT | AA | GT | AA | GG | CT | CT | GG | CT | CC |
| 78 | 315 | F | 167 | 58 | 20.80 | 20 | 17.3 | GA | GT | CT | GA | CT | GA | GT | AA | GA | CT | CC | GA | TT | CT |
| 79 | 318 | F | 152 | 55 | 23.81 | 23 | 23.8 | GA | GT | CT | GA | CT | GA | GG | GG | GG | TT | CT | GG | TT | CT |
| 80 | 319 | M | 173 | 63 | 21.05 | 25 | 1.1  | GG | GG | CT | GA | CT | GA | GG | GA | GG | TT | CT | GA | TT | CC |
| 81 | 321 | F | 156 | 41 | 16.85 | 23 | 11.8 | AA | TT | CT | GA | CT | AA | GT | GA | GA | TT | CT | GA | TT | CC |
| 82 | 322 | M | 178 | 61 | 19.25 | 20 | 5.62 | GA | GT | CT | AA | CT | GA | GT | AA | GG | TT | CT | GG | TT | CT |
| 83 | 323 | M | 170 | 70 | 24.22 | 19 | 18.4 | GG | GG | CC | AA | CT | GA | GT | GA | GG | TT | CC | GG | TT | CT |
| 84 | 327 | M | 178 | 63 | 19.88 | 19 | 1.59 | AA | TT | CT | GA | CT | GA | TT | AA | GG | TT | CT | GG | TT | TT |
| 85 | 329 | M | 173 | 67 | 22.39 | 19 | 18.4 | AA | GT | TT | AA | TT | GA | GG | GA | GG | TT | CC | AA | TT | CC |

|     |     |   |     |    |       |    |      |    |    |    |    |    |    |    |    |    |    |    |    |    |    |
|-----|-----|---|-----|----|-------|----|------|----|----|----|----|----|----|----|----|----|----|----|----|----|----|
| 86  | 330 | M | 179 | 72 | 22.47 | 19 | 1.19 | GA | GT | CC | GG | CC | GA | GT | GA | GG | CT | CT | GG | CT | TT |
| 87  | 331 | M | 165 | 69 | 25.34 | 21 | 3.16 | GG | GG | CC | GG | CT | GA | GG | GA | GA | TT | CT | GA | CT | CC |
| 88  | 333 | M | 172 | 67 | 22.65 | 20 | 3.34 | AA | TT | CT | GA | CC | GG | TT | AA | AA | TT | CT | AA | CT | CT |
| 89  | 334 | M | 173 | 80 | 26.73 | 23 | 4.08 | AA | TT | CT | GA | CC | GA | GG | GA | GG | CT | CC | GG | CT | CT |
| 90  | 335 | M | 167 | 62 | 22.23 | 22 | 1.9  | GG | GG | CT | AA | TT | AA | GT | AA | GG | TT | CT | AA | TT | CC |
| 91  | 336 | F | 164 | 54 | 20.08 | 19 | 26.7 | GA | GT | CT | GA | CC | GA | GT | AA | GG | TT | CT | GG | TT | CC |
| 92  | 337 | M | 173 | 73 | 24.39 | 22 | 2.92 | AA | TT | CT | GA | CT | GA | GT | GA | GA | TT | CC | GG | TT | CC |
| 93  | 338 | M | 176 | 60 | 19.37 | 21 | 0.9  | AA | GT | CC | GG | CT | GA | TT | AA | GA | TT | CC | GG | CT | CC |
| 94  | 339 | F | 167 | 49 | 17.57 | 18 | 6.06 | GA | GT | CT | GA | CC | GG | GT | GA | GG | CT | CT | GG | TT | CT |
| 95  | 340 | F | 155 | 50 | 20.81 | 21 | 6.17 | GA | GT | CT | GA | CT | GA | TT | AA | GG | TT | CT | GA | CT | CT |
| 96  | 342 | F | 157 | 50 | 20.28 | 20 | 7.93 | GA | GT | CC | GG | CT | GA | GG | GA | GA | TT | CC | GG | CT | CT |
| 97  | 343 | F | 154 | 51 | 21.50 | 20 | 4.24 | GA | GT | TT | AA | TT | AA | GT | GA | GA | CT | CT | GA | CT | CT |
| 98  | 344 | M | 180 | 65 | 20.06 | 22 | 0.84 | GA | TT | CT | GA | CT | AA | GT | AA | GA | TT | CC | GG | TT | CC |
| 99  | 346 | M | 182 | 66 | 19.93 | 18 | 0.84 | GA | GT | CT | GA | CT | AA | GT | GA | GG | TT | CC | GG | TT | CT |
| 100 | 347 | F | 161 | 70 | 27.01 | 19 | 25.4 | GA | GT | CT | GA | CC | GG | GT | GA | GG | CT | CT | GG | CT | CC |
| 101 | 348 | M | 171 | 68 | 23.26 | 23 | 2.97 | GA | GG | CC | GG | TT | AA | GT | GA | GA | CT | CC | GG | CC | CC |
| 102 | 349 | M | 171 | 79 | 27.02 | 19 | 19.5 | GA | GG | CT | GA | CC | GA | GG | GA | GG | CT | CT | GG | TT | CC |
| 103 | 350 | M | 176 | 60 | 19.37 | 18 | 1.21 | AA | TT | CC | GG | CT | GA | GT | GA | GG | TT | CT | AA | TT | CT |
| 104 | 351 | F | 171 | 54 | 18.47 | 18 | 9.5  | AA | TT | TT | AA | TT | AA | GG | GA | GG | CT | CT | GG | TT | CC |
| 105 | 352 | F | 158 | 57 | 22.83 | 19 | 12.8 | AA | GT | CC | GG | CT | GA | GT | GA | GG | TT | CC | GG | CT | CC |
| 106 | 353 | F | 160 | 48 | 18.75 | 19 | 15.3 | AA | TT | CT | GA | CT | AA | GT | GA | GG | TT | TT | GA | CT | CC |
| 107 | 354 | M | 166 | 54 | 19.60 | 19 | 1.48 | GA | TT | CT | GA | CT | GA | GT | GA | GG | CT | CC | GA | TT | CT |
| 108 | 357 | M | 171 | 65 | 22.23 | 20 | 2.19 | AA | TT | CT | GG | CC | GG | GG | GA | GG | TT | CC | GG | TT | CC |
| 109 | 359 | M | 175 | 75 | 24.49 | 18 | 18.6 | AA | TT | TT | AA | TT | AA | GT | GA | GG | CT | CT | GA | CT | CC |
| 110 | 361 | F | 160 | 58 | 22.66 | 18 | 9.06 | AA | GT | TT | AA | TT | AA | GG | GA | GG | TT | CC | GG | TT | CC |
| 111 | 362 | M | 175 | 80 | 26.12 | 21 | 0.87 | GA | GT | CC | GG | TT | AA | GG | GA | GG | TT | CT | GG | TT | CT |
| 112 | 363 | M | 187 | 89 | 25.45 | 21 | 12.6 | GA | GT | TT | AA | CC | GA | GG | GA | GG | TT | CT | GA | TT | CC |
| 113 | 364 | M | 174 | 55 | 18.17 | 18 | 6.57 | AA | TT | TT | AA | CT | AA | GT | GA | GG | CT | CT | GG | TT | CC |
| 114 | 365 | M | 171 | 55 | 18.81 | 19 | 1.62 | AA | TT | CT | GA | CT | GA | GT | AA | GG | TT | CT | GG | CT | CT |
| 115 | 367 | F | 150 | 47 | 20.89 | 19 | 14.2 | GA | TT | CT | GA | TT | AA | GG | GA | GA | CT | CT | GG | TT | CC |
| 116 | 368 | M | 175 | 69 | 22.53 | 20 | 3.98 | GG | GG | CT | GA | CT | GA | GT | GA | GG | TT | CC | GA | TT | CT |

|     |     |   |     |    |       |    |      |    |    |    |    |    |    |    |    |    |    |    |    |    |    |
|-----|-----|---|-----|----|-------|----|------|----|----|----|----|----|----|----|----|----|----|----|----|----|----|
| 117 | 369 | F | 160 | 53 | 20.70 | 19 | 7.24 | GA | GT | CC | GG | CC | GA | GG | GA | GA | CT | CT | GG | TT | CT |
| 118 | 370 | M | 174 | 58 | 19.16 | 22 | 3.74 | GA | GT | CT | GA | CC | GG | GT | AA | GG | TT | CT | GA | TT | CC |
| 119 | 374 | M | 180 | 70 | 21.60 | 19 | 5.72 | GG | GG | CC | GG | CT | GA | GT | GA | AA | CT | CC | GG | TT | CT |
| 120 | 375 | F | 165 | 70 | 25.71 | 17 | 47.9 | AA | TT | TT | AA | CT | AA | GT | GA | GG | TT | CT | GA | TT | CC |
| 121 | 376 | F | 160 | 55 | 21.48 | 19 | 17.8 | AA | TT | CT | GA | TT | AA | GG | GG | GG | TT | CT | GG | TT | CC |
| 122 | 378 | F | 155 | 50 | 20.81 | 17 | 32.2 | GG | GG | CC | GG | CC | GG | GT | GA | GA | TT | CC | GG | CT | CT |
| 123 | 379 | F | 162 | 47 | 17.91 | 18 | 6.53 | GA | TT | CT | GA | TT | AA | GT | GA | GG | TT | CC | GG | TT | TT |
| 124 | 380 | M | 175 | 72 | 23.51 | 18 | 8.63 | GA | GG | CT | GA | CT | GA | GT | GA | GG | CT | CT | GG | CT | CC |
| 125 | 381 | M | 175 | 60 | 19.59 | 20 | 0.9  | GA | GT | CC | GG | CT | GA | TT | AA | GG | CT | CC | GG | CT | CC |
| 126 | 382 | M | 170 | 52 | 17.99 | 18 | 3.62 | GA | TT | CT | GA | TT | AA | GT | AA | GG | CT | CC | GG | CT | CC |
| 127 | 383 | M | 170 | 68 | 23.53 | 23 | 2.66 | AA | TT | TT | AA | TT | AA | TT | AA | GG | CT | CT | GA | TT | CT |
| 128 | 384 | M | 165 | 65 | 23.88 | 22 | 5.61 | AA | TT | CC | GG | TT | AA | GG | GA | GA | TT | CC | GG | TT | CC |
| 129 | 386 | M | 163 | 61 | 22.96 | 21 | 3.6  | GA | GT | CT | GA | TT | AA | GG | GA | GG | TT | CC | GA | TT | TT |
| 130 | 387 | F | 169 | 56 | 19.61 | 18 | 10.1 | GA | GT | CT | GA | TT | AA | TT | AA | GA | TT | CC | GG | TT | CC |
| 131 | 389 | M | 170 | 68 | 23.53 | 21 | 1.15 | AA | TT | TT | AA | CC | GA | GT | GA | GG | TT | CC | GG | TT | TT |
| 132 | 390 | M | 182 | 81 | 24.45 | 22 | 1.56 | AA | TT | TT | AA | TT | AA | GG | GG | GA | TT | CC | GG | CT | TT |
| 133 | 391 | M | 184 | 84 | 24.81 | 21 | 1.38 | GG | GT | CT | GA | CT | GA | GG | GA | GG | TT | CC | GA | TT | TT |
| 134 | 392 | F | 170 | 75 | 25.95 | 18 | 27.1 | AA | TT | TT | AA | TT | AA | GG | GA | GG | CT | CC | GG | TT | CC |
| 135 | 393 | M | 170 | 69 | 23.88 | 20 | 2.99 | GA | GT | CC | GG | CC | GA | GG | GA | GG | TT | CT | GA | TT | TT |
| 136 | 394 | M | 171 | 62 | 21.20 | 27 | 7.55 | GA | GT | CC | GG | CT | GA | TT | AA | GG | TT | CC | GG | TT | CT |
| 137 | 395 | F | 163 | 48 | 18.07 | 18 | 7.42 | AA | GT | TT | AA | TT | AA | GT | GA | GG | CT | TT | GG | TT | CT |
| 138 | 396 | M | 175 | 68 | 22.20 | 19 | 1.05 | AA | TT | CC | GG | CT | GG | GG | AA | GA | CT | CC | GA | TT | TT |
| 139 | 397 | M | 167 | 58 | 20.80 | 19 | 1.56 | GA | GT | CC | GG | CT | GA | GT | GA | GA | TT | CC | GG | TT | CC |
| 140 | 398 | F | 164 | 68 | 25.28 | 21 | 25   | GA | GT | CT | GA | CT | GA | TT | AA | GA | CT | CT | GA | TT | CT |
| 141 | 399 | M | 169 | 70 | 24.51 | 19 | 12.1 | GA | GT | CT | GA | CT | GA | GG | GA | GG | CT | CC | GG | CT | CC |
| 142 | 400 | M | 170 | 55 | 19.03 | 24 | 3.72 | GA | GT | TT | AA | CC | GA | TT | AA | GA | CT | CC | GG | TT | CC |
| 143 | 402 | M | 180 | 68 | 20.99 | 22 | 13.3 | GA | GT | CT | GA | CT | AA | GT | GA | GG | TT | CC | GG | TT | CT |
| 144 | 403 | M | 178 | 72 | 22.72 | 22 | 0.73 | AA | TT | TT | AA | CC | AA | GT | AA | GG | TT | CC | GA | TT | CT |
| 145 | 404 | M | 180 | 75 | 23.15 | 19 | 9.06 | GA | GT | TT | AA | CT | AA | GG | GG | GA | CT | CC | GG | TT | CT |
| 146 | 406 | M | 168 | 58 | 20.55 | 19 | 1.36 | AA | TT | CC | GG | CC | GG | GG | GA | GG | CC | CT | GA | TT | CT |
| 147 | 407 | M | 172 | 72 | 24.34 | 18 | 2.3  | GA | GG | CT | GA | CC | GG | GT | GA | GG | CT | CT | GA | TT | CT |

|     |     |   |     |     |       |    |      |    |    |    |    |    |    |    |    |    |    |    |    |    |    |
|-----|-----|---|-----|-----|-------|----|------|----|----|----|----|----|----|----|----|----|----|----|----|----|----|
| 148 | 408 | M | 161 | 55  | 21.22 | 18 | 2.31 | AA | TT | TT | AA | CT | GA | GG | GG | GG | TT | CT | AA | TT | CC |
| 149 | 410 | F | 157 | 42  | 17.04 | 19 | 9.54 | AA | GT | CT | GA | TT | AA | GT | GA | GG | TT | CT | GA | TT | CT |
| 150 | 412 | M | 175 | 67  | 21.88 | 18 | 4.33 | AA | TT | CT | GA | CC | GA | GT | GA | GG | CC | TT | AA | CT | CC |
| 151 | 413 | F | 158 | 45  | 18.03 | 18 | 5.02 | AA | TT | CT | GG | TT | AA | GT | GA | GG | TT | CT | GG | TT | CT |
| 152 | 414 | M | 175 | 63  | 20.57 | 17 | 3.51 | AA | TT | CT | GA | TT | AA | GT | AA | GG | TT | CT | GA | TT | CC |
| 153 | 416 | M | 169 | 54  | 18.91 | 19 | 1.38 | AA | TT | CC | GA | CT | GA | GT | AA | GG | TT | CT | GA | TT | CC |
| 154 | 417 | F | 155 | 42  | 17.48 | 18 | 15.4 | GA | TT | CT | GG | CT | GA | TT | GG | GG | TT | CC | GG | CT | CC |
| 155 | 418 | M | 172 | 58  | 19.61 | 18 | 2.05 | AA | GT | CC | GG | CT | GA | GG | AA | GG | TT | CC | GG | TT | CC |
| 156 | 419 | M | 173 | 80  | 26.73 | 19 | 11.2 | GA | GT | CC | GG | CT | GA | TT | AA | GG | CT | CC | GG | TT | CT |
| 157 | 603 | F | 162 | 53  | 20.20 | 19 | 12.5 | GG | GT | CC | GG | CT | AA | GG | GG | GA | TT | TT | GG | TT | CC |
| 158 | 604 | M | 160 | 44  | 17.19 | 19 | 8.61 | AA | TT | CT | GA | CT | AA | GT | GA | GG | TT | CC | GG | CT | CT |
| 159 | 605 | F | 153 | 50  | 21.36 | 19 | 12.3 | GG | GG | CT | GA | TT | GA | GT | AA | GG | CC | CC | GG | CT | TT |
| 160 | 606 | M | 170 | 71  | 24.57 | 20 | 0.95 | GG | TT | TT | AA | TT | AA | GG | GA | GG | TT | CC | GA | TT | CC |
| 161 | 607 | F | 160 | 61  | 23.83 | 19 | 17.7 | AA | TT | CT | GA | CT | GA | GG | GA | GG | CT | CT | GG | TT | CT |
| 162 | 608 | M | 186 | 65  | 18.79 | 18 | 1.95 | GG | GT | TT | AA | CT | GA | GT | AA | AA | CT | CC | GG | CT | TT |
| 163 | 609 | M | 175 | 75  | 24.49 | 19 | 13.8 | AA | GT | TT | AA | TT | AA | GT | AA | GA | TT | CT | GG | TT | CT |
| 164 | 611 | F | 160 | 59  | 23.05 | 19 | 28.7 | AA | TT | CT | GA | CT | GA | GT | GA | GG | CT | CT | GG | CT | CC |
| 165 | 612 | F | 164 | 52  | 19.33 | 19 | 20.9 | GA | GG | TT | AA | CT | GA | GT | GA | GG | TT | CT | GG | TT | CC |
| 166 | 613 | F | 161 | 63  | 24.30 | 19 | 27.7 | GA | TT | CC | GG | CT | AA | TT | GA | GA | TT | CC | GG | TT | CT |
| 167 | 614 | F | 151 | 56  | 24.56 | 19 | 31.3 | AA | TT | CT | GA | TT | AA | GG | AA | GG | TT | CC | GA | TT | CT |
| 168 | 615 | M | 172 | 70  | 23.66 | 19 | 4.13 | GG | GT | CT | GA | CT | GA | GG | GA | GA | TT | CC | GG | TT | CC |
| 169 | 617 | F | 160 | 56  | 21.88 | 18 | 69.1 | GG | GT | CT | GA | CC | GG | GG | GA | GG | TT | CT | GG | CT | CC |
| 170 | 618 | M | 178 | 75  | 23.67 | 22 | 10.6 | GG | TT | CT | GA | CT | GA | GG | GA | GA | CT | CT | GG | TT | CT |
| 171 | 619 | F | 165 | 56  | 20.57 | 19 | 10.7 | AA | GT | CC | GG | CC | GA | GG | GA | GG | TT | CT | GA | CT | CC |
| 172 | 620 | F | 156 | 45  | 18.49 | 18 | 14.1 | GG | GT | CC | GG | CC | GG | GT | AA | GG | CT | TT | GG | CT | CC |
| 173 | 621 | M | 177 | 49  | 15.64 | 20 | 5.43 | GA | GT | CT | GA | TT | AA | GT | GA | GG | CT | CT | GG | CT | TT |
| 174 | 622 | F | 157 | 65  | 26.37 | 19 | 42   | GG | GT | TT | AA | CT | GA | GT | AA | GG | TT | CT | GG | TT | CC |
| 175 | 623 | F | 155 | 52  | 21.64 | 21 | 21.9 | GA | GT | CC | GG | CT | GA | GT | AA | GG | CT | CC | GA | CT | CT |
| 176 | 624 | F | 160 | 60  | 23.44 | 18 | 10   | GA | TT | CC | GG | CC | GA | GT | GA | GG | CT | CC | GG | CT | CT |
| 177 | 625 | F | 160 | 54  | 21.09 | 19 | 21.2 | AA | TT | CC | GG | CC | GG | GT | GA | GG | CT | CT | GG | TT | TT |
| 178 | 627 | M | 185 | 100 | 29.22 | 19 | 22.9 | GA | TT | CT | GA | CT | AA | GT | GA | GG | TT | CT | GG | TT | CT |

|     |     |   |     |    |       |    |      |    |    |    |    |    |    |    |    |    |    |    |    |    |    |
|-----|-----|---|-----|----|-------|----|------|----|----|----|----|----|----|----|----|----|----|----|----|----|----|
| 179 | 629 | M | 162 | 48 | 18.29 | 20 | 4.47 | AA | TT | CC | GG | CT | GA | GT | GA | GG | TT | CC | GG | CT | CC |
| 180 | 630 | M | 176 | 51 | 16.46 | 19 | 4.7  | GA | GT | CT | GA | TT | AA | GG | GA | GA | TT | CT | GA | TT | CT |
| 181 | 631 | M | 174 | 68 | 22.46 | 25 | 4.2  | AA | GT | CC | GG | CC | GG | GG | GG | GA | CT | CC | GG | CT | CT |
| 182 | 632 | F | 155 | 53 | 22.06 | 29 | 8.83 | AA | GT | CT | GA | TT | AA | GT | GA | GG | TT | CT | GG | CC | CC |
| 183 | 633 | F | 160 | 67 | 26.17 | 19 | 11.7 | GG | GT | TT | GA | TT | AA | GT | AA | GG | CT | CC | GG | CT | CC |
| 184 | 635 | F | 160 | 55 | 21.48 | 19 | 13.9 | GA | GT | CC | GG | CC | GG | GG | AA | GA | TT | CC | GG | TT | CT |
| 185 | 636 | M | 188 | 80 | 22.63 | 19 | 5.39 | GA | GT | CT | GA | TT | AA | TT | AA | GG | CT | CC | GG | TT | CC |
| 186 | 637 | M | 175 | 63 | 20.57 | 19 | 1.46 | GA | GT | TT | AA | TT | AA | GT | GA | GG | CC | CC | GG | TT | CC |
| 187 | 638 | F | 172 | 60 | 20.28 | 19 | 11   | AA | TT | CT | GA | CC | GA | TT | AA | GG | CT | CT | GA | CT | CC |
| 188 | 639 | F | 158 | 49 | 19.63 | 19 | 15.9 | AA | TT | CT | GA | TT | AA | GT | GA | GG | TT | CT | GA | TT | CT |
| 189 | 640 | F | 150 | 56 | 24.89 | 19 | 37   | AA | TT | TT | AA | TT | AA | GG | GA | GG | TT | CT | GG | TT | CT |
| 190 | 641 | M | 183 | 84 | 25.08 | 19 | 12.3 | GG | GG | TT | AA | CC | AA | GT | GA | GA | TT | CC | GA | CC | CT |
| 191 | 642 | M | 179 | 65 | 20.29 | 18 | 1.35 | AA | TT | TT | AA | TT | AA | GT | GA | GG | TT | CT | GG | CT | CT |
| 192 | 644 | M | 170 | 53 | 18.34 | 19 | 4.47 | GG | GG | CT | GA | CC | GA | GT | GA | GG | CT | CT | GG | TT | CT |
| 193 | 646 | F | 163 | 60 | 22.58 | 19 | 23.3 | GG | GG | CT | GA | TT | AA | TT | AA | GG | TT | CC | GG | TT | CC |
| 194 | 647 | M | 182 | 77 | 23.25 | 19 | 10.8 | AA | GT | TT | AA | CT | AA | GG | GA | GG | CT | CT | GG | CT | CT |
| 195 | 648 | F | 155 | 38 | 15.82 | 19 | 4.25 | GA | GT | TT | AA | TT | AA | GG | GA | GA | TT | CC | GG | TT | CC |
| 196 | 649 | M | 173 | 78 | 26.06 | 20 | 6    | GA | GT | TT | AA | TT | AA | GT | AA | GG | CT | CT | GG | TT | CT |
| 197 | 650 | F | 150 | 45 | 20.00 | 21 | 10.6 | GG | GG | TT | AA | TT | AA | GG | GG | GG | TT | CT | GA | TT | CC |
| 198 | 651 | M | 171 | 60 | 20.52 | 18 | 32.3 | GA | GT | CT | GA | CC | GG | GG | AA | GA | CT | CT | GG | TT | TT |
| 199 | 652 | F | 165 | 58 | 21.30 | 22 | 37.1 | AA | TT | CC | GG | CT | GA | GT | AA | GG | CT | CT | GG | CT | TT |
| 200 | 653 | F | 160 | 47 | 18.36 | 19 | 19.9 | GA | GT | TT | AA | TT | AA | GT | AA | GG | CT | CT | GG | TT | TT |
| 201 | 655 | F | 155 | 50 | 20.81 | 19 | 17.4 | GA | TT | CC | GG | CT | GA | GT | AA | GA | CT | CC | GG | TT | CT |
| 202 | 656 | F | 167 | 58 | 20.80 | 19 | 5.79 | AA | GT | CC | GG | CC | GG | GT | GA | GG | CC | CC | GA | TT | TT |
| 203 | 657 | F | 164 | 63 | 23.42 | 19 | 20.4 | AA | GT | TT | AA | CT | AA | GT | AA | GA | TT | TT | GG | TT | CT |
| 204 | 658 | F | 163 | 63 | 23.71 | 19 | 19.3 | GA | GT | TT | AA | CT | AA | TT | AA | GG | CT | CT | GG | TT | CC |
| 205 | 659 | F | 161 | 60 | 23.15 | 19 | 53.2 | AA | TT | CT | GA | CT | GA | GG | GA | GG | TT | CT | GG | TT | CT |
| 206 | 660 | F | 168 | 69 | 24.45 | 19 | 23.4 | GG | TT | TT | AA | CC | GG | GG | AA | GG | TT | CC | GG | TT | CT |
| 207 | 661 | F | 162 | 44 | 16.77 | 19 | 19.2 | AA | TT | CT | GA | TT | AA | GG | GA | GA | CT | CC | GA | TT | CC |
| 208 | 662 | M | 176 | 75 | 24.21 | 18 | 5.06 | AA | TT | CT | GA | CT | AA | GT | AA | GG | TT | CC | GG | CT | CC |
| 209 | 663 | M | 164 | 50 | 18.59 | 22 | 1.51 | AA | GG | TT | AA | TT | AA | GG | GG | GG | CC | CT | GG | TT | CT |

|     |     |   |     |    |       |    |      |    |    |    |    |    |    |    |    |    |    |    |    |    |    |
|-----|-----|---|-----|----|-------|----|------|----|----|----|----|----|----|----|----|----|----|----|----|----|----|
| 210 | 664 | F | 161 | 59 | 22.76 | 19 | 40.1 | AA | TT | CC | GG | CT | GA | GG | GA | GG | CT | CT | GG | CT | CC |
| 211 | 675 | F | 165 | 60 | 22.04 | 19 | 7.88 | AA | TT | CT | GA | CT | AA | GT | GA | GA | CT | CC | GG | CT | CT |
| 212 | 678 | F | 162 | 52 | 19.81 | 18 | 12.2 | GA | GT | CT | GA | CC | GG | GG | GG | GG | TT | CT | GA | TT | CC |
| 213 | 681 | F | 160 | 51 | 19.92 | 25 | 4.71 | GA | TT | CT | GA | CT | GA | GG | GA | GG | TT | CT | GA | CT | CT |
| 214 | 682 | F | 157 | 48 | 19.47 | 23 | 12.3 | GA | GT | CC | GG | CT | GA | GG | GA | GG | CT | CT | GG | TT | CC |
| 215 | 683 | F | 165 | 54 | 19.83 | 30 | 21.3 | GG | GG | TT | AA | TT | AA | GG | AA | GG | CT | CT | GG | CT | CC |
| 216 | 684 | F | 165 | 59 | 21.67 | 23 | 13.8 | GA | GT | TT | AA | CT | AA | GG | AA | GA | TT | CT | GG | TT | CC |
| 217 | 686 | F | 164 | 62 | 23.05 | 20 | 22.5 | GA | GG | TT | AA | CT | GA | TT | AA | GG | CC | CC | GG | TT | TT |
| 218 | 687 | F | 167 | 58 | 20.80 | 19 | 14.3 | GA | TT | TT | AA | TT | AA | GT | GA | GG | CT | CC | GG | CT | TT |
| 219 | 689 | F | 158 | 54 | 21.63 | 19 | 20.6 | GA | GT | CT | GA | CT | GA | TT | AA | GA | TT | TT | GG | TT | CC |
| 220 | 690 | F | 158 | 54 | 21.63 | 19 | 14.5 | AA | GT | CT | GA | TT | AA | GT | GA | GG | CT | CC | GG | CT | CT |
| 221 | 691 | M | 180 | 66 | 20.37 | 18 | 1.9  | GA | GT | CT | GA | CC | GA | GT | GA | GG | TT | CC | GG | TT | TT |
| 222 | 692 | F | 164 | 53 | 19.71 | 20 | 21.2 | AA | TT | TT | AA | TT | AA | GG | GA | GG | TT | CC | GG | CT | CC |
| 223 | 693 | M | 173 | 76 | 25.39 | 20 | 25   | AA | TT | CC | GG | CT | GA | GG | AA | GG | CT | CC | GA | CT | TT |
| 224 | 694 | M | 165 | 65 | 23.88 | 18 | 2.54 | AA | TT | TT | AA | CC | GA | GG | GA | GA | CT | CC | GA | TT | CT |
| 225 | 695 | F | 168 | 59 | 20.90 | 19 | 37.2 | GA | GG | TT | AA | CT | GA | GG | GA | GG | CT | CC | GG | TT | CC |
| 226 | 696 | F | 167 | 65 | 23.31 | 20 | 13.3 | GA | GT | CC | GG | CC | GG | GG | GA | GA | TT | CC | GG | CT | CT |
| 227 | 712 | M | 173 | 74 | 24.73 | 18 | 6.43 | GG | GG | TT | AA | TT | AA | GG | GG | GG | CC | TT | GA | TT | CC |
| 228 | 713 | F | 154 | 57 | 24.03 | 22 | 29   | AA | TT | CT | GA | CT | GA | GG | GG | GA | TT | CT | GA | TT | CC |
| 229 | 715 | F | 167 | 55 | 19.72 | 19 | 11.3 | AA | GT | CT | GA | TT | AA | GT | AA | GA | TT | CT | GA | TT | CT |
| 230 | 716 | F | 160 | 60 | 23.44 | 19 | 10.7 | GA | GT | CT | GA | CC | GA | GG | GG | GA | TT | CT | GA | TT | CC |
| 231 | 717 | M | 156 | 50 | 20.55 | 20 | 3.95 | GA | TT | CC | GG | CT | GA | GG | AA | GG | TT | CT | GG | TT | CC |
| 232 | 719 | F | 153 | 46 | 19.65 | 21 | 7.86 | GG | GG | CT | GA | CT | GA | GT | GA | GG | TT | CC | GG | CT | CC |
| 233 | 720 | F | 162 | 52 | 19.81 | 20 | 6.44 | AA | TT | CT | GA | CC | GG | TT | AA | GG | CT | CT | GA | TT | TT |
| 234 | 721 | M | 160 | 50 | 19.53 | 20 | 1.56 | GG | GG | CT | GA | TT | AA | GT | AA | GG | TT | CC | GA | CT | CT |
| 235 | 722 | F | 160 | 66 | 25.78 | 23 | 62.1 | AA | TT | CC | GG | CT | AA | GG | GG | GG | TT | CC | GA | CT | TT |
| 236 | 724 | F | 165 | 66 | 24.24 | 23 | 26.3 | GG | GG | CC | GG | TT | AA | GT | GA | GG | TT | CT | GG | TT | CC |
| 237 | 725 | F | 163 | 50 | 18.82 | 24 | 7.42 | GA | GG | CT | GA | CC | GG | GG | GA | GG | CT | CT | GG | TT | CT |
| 238 | 726 | F | 163 | 60 | 22.58 | 22 | 15.8 | GA | GT | CT | GA | CC | GA | GT | AA | GG | CT | CC | GG | TT | CC |
| 239 | 727 | F | 173 | 65 | 21.72 | 24 | 12.2 | GA | GG | CT | GA | CT | GA | GT | GA | GG | TT | TT | GG | CT | CT |
| 240 | 728 | F | 156 | 52 | 21.37 | 28 | 9.45 | AA | GT | CT | GA | TT | AA | GG | GG | GG | TT | CC | GG | CT | TT |



|     |     |   |     |    |       |    |      |    |    |    |    |    |    |    |    |    |    |    |    |    |    |
|-----|-----|---|-----|----|-------|----|------|----|----|----|----|----|----|----|----|----|----|----|----|----|----|
| 241 | 729 | F | 160 | 43 | 16.80 | 18 | 18.5 | GA | GT | CT | GA | CC | GG | GT | GA | GA | CT | CT | GA | TT | CC |
| 242 | 730 | F | 171 | 66 | 22.57 | 19 | 28.4 | AA | GT | CT | GA | CC | GA | GG | AA | GG | TT | CC | GA | TT | CT |
| 243 | 732 | F | 168 | 60 | 21.26 | 19 | 36.3 | AA | TT | CC | GG | CC | AA | GG | GA | GA | TT | CC | GG | TT | CT |
| 244 | 733 | F | 157 | 60 | 24.34 | 23 | 8.22 | AA | GT | CC | GG | CT | GA | GG | GG | GG | TT | CT | GA | CT | TT |
| 245 | 735 | F | 163 | 45 | 16.94 | 19 | 11   | GG | GG | CT | GA | CT | AA | GT | AA | GA | TT | CC | GA | TT | CT |
| 246 | 736 | F | 158 | 55 | 22.03 | 19 | 11.7 | GA | GT | CC | GG | CC | GG | GG | AA | AA | TT | CC | GA | TT | CC |
| 247 | 737 | M | 172 | 62 | 20.96 | 17 | 1.92 | GG | GT | CT | GA | CT | GA | GT | GA | GG | TT | CT | GA | TT | CT |
| 248 | 738 | F | 150 | 42 | 18.67 | 24 | 18.4 | AA | GT | CC | GG | CT | AA | GT | AA | GG | CT | CT | GG | CT | TT |
| 249 | 739 | F | 160 | 75 | 29.30 | 24 | 55.6 | AA | TT | CC | GG | CT | GA | GG | GG | GG | TT | TT | GG | TT | CT |
| 250 | 740 | F | 161 | 50 | 19.29 | 23 | 13.5 | GA | GG | CT | GA | CT | GA | GG | GG | GG | CC | CC | GA | TT | CT |
| 251 | 741 | F | 163 | 67 | 25.22 | 23 | 20.7 | GA | GT | TT | AA | TT | AA | GT | GA | GA | TT | CT | GA | CT | CC |
| 252 | 742 | F | 164 | 47 | 17.47 | 22 | 7.01 | GA | GT | CT | GA | TT | AA | GG | AA | GG | CT | TT | GG | CT | CT |
| 253 | 743 | F | 173 | 63 | 21.05 | 23 | 6.09 | GA | GT | CC | GG | CC | GG | GT | GA | GG | CT | CC | GA | CT | CT |
| 254 | 745 | F | 158 | 50 | 20.03 | 21 | 16.9 | GG | GT | TT | AA | CT | AA | GG | GA | GG | TT | TT | GG | CT | CC |
| 255 | 746 | F | 166 | 60 | 21.77 | 21 | 23.7 | AA | GT | CC | GG | CT | GA | GT | AA | GG | CT | CT | GG | CT | CC |
| 256 | 747 | F | 163 | 60 | 22.58 | 21 | 22.5 | AA | GT | CT | GA | CT | GA | GT | AA | GG | TT | CT | GG | TT | CT |
| 257 | 749 | F | 150 | 48 | 21.33 | 21 | 7.65 | GA | GT | CT | GA | TT | AA | GT | GA | GA | TT | CC | GA | TT | CT |
| 258 | 751 | F | 152 | 40 | 17.31 | 21 | 27.6 | GA | GT | CT | GA | CT | GA | GT | AA | GG | CT | TT | GG | TT | CT |
| 259 | 752 | M | 177 | 55 | 17.56 | 20 | 3.94 | AA | TT | CT | GG | CT | GA | GT | AA | GG | CT | CT | GG | CT | CC |
| 260 | 753 | F | 159 | 48 | 18.99 | 21 | 13.6 | GA | GT | CC | GG | CT | GA | GG | AA | AA | CT | CT | GG | TT | CC |
| 261 | 754 | F | 160 | 75 | 29.30 | 20 | 43.2 | AA | TT | CT | GA | CT | AA | GG | GA | GG | CT | CT | GG | TT | CT |
| 262 | 755 | M | 172 | 67 | 22.65 | 22 | 1.36 | GA | TT | CT | GA | TT | AA | TT | AA | GG | CT | CC | GG | CT | CC |
| 263 | 756 | F | 166 | 48 | 17.42 | 22 | 35   | AA | TT | CT | GA | CT | AA | GG | GG | GG | CT | TT | GG | TT | CC |
| 264 | 758 | F | 152 | 43 | 18.61 | 20 | 7.49 | GG | GG | CT | GA | CT | AA | GT | AA | GA | TT | CC | GG | TT | CT |
| 265 | 759 | F | 148 | 45 | 20.54 | 19 | 8.27 | GA | TT | TT | AA | CT | AA | GG | GA | GG | TT | CT | GG | CT | CC |
| 266 | 760 | M | 175 | 75 | 24.49 | 24 | 8.32 | GA | GT | CT | GA | TT | AA | GG | GG | GG | CT | CT | GG | CT | CT |
| 267 | 761 | F | 166 | 55 | 19.96 | 21 | 10.9 | GG | GG | CC | GG | CC | GG | GG | AA | GG | TT | CC | GA | TT | CT |
| 268 | 762 | M | 171 | 71 | 24.28 | 20 | 8.97 | AA | TT | TT | AA | CT | AA | GT | GA | GA | CT | CT | GG | CT | CT |
| 269 | 763 | F | 155 | 54 | 22.48 | 22 | 15.1 | GA | GG | CT | GA | CT | GA | GG | GA | GA | TT | CT | GG | TT | CC |
| 270 | 764 | F | 160 | 66 | 25.78 | 20 | 6.16 | AA | TT | CC | GG | CT | GA | GT | AA | GG | TT | CC | GG | CT | CC |
| 271 | 765 | F | 158 | 48 | 19.23 | 20 | 15.1 | GA | GT | CT | GG | CC | GA | GG | AA | GG | TT | CC | GG | CC | CT |

|     |     |   |     |    |       |    |      |    |    |    |    |    |    |    |    |    |    |    |    |    |    |
|-----|-----|---|-----|----|-------|----|------|----|----|----|----|----|----|----|----|----|----|----|----|----|----|
| 272 | 766 | F | 158 | 79 | 31.65 | 25 | 12   | GA | GT | CT | GA | CC | GA | GT | GA | GG | TT | CC | GG | CT | CC |
| 273 | 767 | F | 160 | 51 | 19.92 | 20 | 13.3 | GG | GT | TT | AA | CT | AA | GT | GA | GG | CT | TT | GG | CT | CC |
| 274 | 768 | F | 157 | 48 | 19.47 | 20 | 16   | GA | GT | CC | GG | CT | GA | TT | GA | GG | CT | CT | GG | CT | CC |
| 275 | 769 | F | 150 | 48 | 21.33 | 20 | 14.6 | AA | TT | CT | GA | CC | GA | TT | AA | GA | CC | CT | GG | TT | CC |
| 276 | 771 | M | 174 | 62 | 20.48 | 23 | 2.4  | AA | TT | CC | GG | CT | GA | GT | GA | GA | TT | CT | GA | TT | CC |
| 277 | 772 | M | 172 | 67 | 22.65 | 21 | 2.48 | AA | TT | CC | GG | CC | GG | GT | GA | GG | CT | CT | GA | TT | TT |
| 278 | 773 | F | 162 | 51 | 19.43 | 21 | 6.97 | GA | GT | CT | GA | CT | GA | GG | GA | GG | CT | CC | GA | CT | CC |
| 279 | 774 | F | 156 | 60 | 24.65 | 22 | 7.93 | GA | GG | CC | GG | CC | GG | GT | AA | GG | CT | CC | GG | TT | CT |
| 280 | 775 | M | 182 | 75 | 22.64 | 21 | 5.41 | GG | GG | CT | GA | CC | GA | GT | GA | GA | CT | CC | GG | TT | CC |
| 281 | 776 | M | 173 | 70 | 23.39 | 19 | 11.5 | GA | TT | TT | AA | TT | AA | TT | AA | GG | CC | CC | AA | TT | CC |

F – females; M – males.

**Table S2.** Allele frequencies of studied SNP-markers of *UCP1*, *UCP2*, *UCP3*, *FNDC5*, *LEPR*, *PTGS2*, *TRPV1*, *BDNF*, *CIDEA*, *PPARGC1A* genes in the Yakut population

| No | SNP        | Gene            | Genotypes, n |           |           | Allele frequency |            | HWE <sup>1</sup> |
|----|------------|-----------------|--------------|-----------|-----------|------------------|------------|------------------|
| 1  | rs1800592  | <i>UCP1</i>     | AA<br>95     | AG<br>108 | GG<br>41  | A<br>0.618       | G<br>0.382 | 0.468            |
| 2  | rs3811787  |                 | TT<br>86     | TG<br>115 | GG<br>43  | T<br>0.583       | G<br>0.417 | 0.356            |
| 3  | rs659366   | <i>UCP2</i>     | TT<br>67     | TC<br>110 | CC<br>67  | T<br>0.503       | C<br>0.497 | 0.593            |
| 4  | rs660339   |                 | AA<br>70     | AG<br>100 | GG<br>74  | A<br>0.473       | G<br>0.527 | 0.05             |
| 5  | rs1800849  | <i>UCP3</i>     | TT<br>69     | TC<br>114 | CC<br>61  | T<br>0.538       | C<br>0.462 | 0.155            |
| 6  | rs2075577  |                 | AA<br>102    | AG<br>111 | GG<br>31  | A<br>0.659       | G<br>0.341 | 0.499            |
| 7  | rs1137101  | <i>LEPR</i>     | AA<br>6      | AG<br>65  | GG<br>173 | A<br>0.156       | G<br>0.844 | 0.519            |
| 8  | rs16835198 | <i>FNDC5</i>    | TT<br>28     | TG<br>115 | GG<br>101 | T<br>0.341       | G<br>0.659 | 0.356            |
| 9  | rs3480     |                 | AA<br>94     | AG<br>125 | GG<br>25  | A<br>0.637       | G<br>0.363 | 0.468            |
| 10 | rs689466   | <i>PTGS2</i>    | TT<br>140    | TC<br>91  | CC<br>13  | T<br>0.777       | C<br>0.223 | 0.356            |
| 11 | rs150846   | <i>TRPV1</i>    | AA<br>18     | AG<br>46  | GG<br>110 | A<br>0.360       | G<br>0.640 | 0.115            |
| 12 | rs6265     | <i>BDNF</i>     | AA<br>8      | AG<br>73  | GG<br>163 | A<br>0.151       | G<br>0.849 | 0.468            |
| 13 | rs8092502  | <i>CIDEA</i>    | TT<br>144    | TC<br>88  | CC<br>12  | T<br>0.750       | C<br>0.250 | 0.512            |
| 14 | rs12650562 | <i>PPARGC1A</i> | TT<br>31     | TC<br>102 | CC<br>111 | T<br>0.320       | C<br>0.680 | 0.969            |

<sup>1</sup> – p-values of deviation from Hardy–Weinberg Equilibrium (HWE).

**Table S3.** ANOVA analysis of serum leptin levels depending on genotypes in the Yakuts with normal weight (n=215)

| Gene, SNP                    |          | Mean±std.dev       |                    |                   | F; p                       |
|------------------------------|----------|--------------------|--------------------|-------------------|----------------------------|
| <i>UCP1</i> , rs1800592      | GG       | AG                 | AA                 |                   |                            |
|                              | F        | 19.59±14.09        | 16.41±9.88         | 19.97±10.79       | F=1.8057; p=0.16814        |
|                              | M        | 4.67±4.79          | 5.71±6.6           | 4.24±4.83         | F=0.50827; p=0.60380       |
| <i>UCP1</i> , rs3811787      | TT       | GT                 | GG                 |                   |                            |
|                              | <b>F</b> | <b>21.94±12.28</b> | <b>16.31±10.33</b> | <b>17.27±9.19</b> | <b>F=3.8329; p=0.02394</b> |
|                              | M        | 3.57±3.91          | 6.25±6.93          | 4.99±4.83         | F=1.7959; p=0.17377        |
| <i>UCP2</i> , rs659366       | CC       | CT                 | TT                 |                   |                            |
|                              | F        | 17.08±10.07        | 18.77±11.96        | 18.24±9.98        | F=0.29506; p=0.74495       |
|                              | M        | 3.57±4.06          | 4.95±5.97          | 5.97±5.9          | F=0.93174; p=0.39884       |
| <i>UCP2</i> , rs660339       | AA       | AG                 | GG                 |                   |                            |
|                              | F        | 18.05±10.58        | 18.09±11.94        | 18.5±9.97         | F=0.02142; p=0.97882       |
|                              | M        | 2.79±1.92          | 4.99±6.15          | 6.32±6.144        | F=2.1595; p=0.12323        |
| <i>UCP3</i> , rs1800849      | CC       | TC                 | CC                 |                   |                            |
|                              | F        | 17.45±12.58        | 18.05±10.13        | 18.9±11.02        | F=0.19620; p=0.82207       |
|                              | M        | 4.45±7.29          | 4.63±4.43          | 5.62±5.64         | F=0.26135; p=0.77078       |
| <i>UCP3</i> , rs2075577      | GG       | GA                 | AA                 |                   |                            |
|                              | F        | 17.42±14.52        | 18.72±10.64        | 17.9±10.12        | F=0.14249; p=0.86732       |
|                              | M        | 5.88±9.96          | 4.26±4.49          | 5.32±4.87         | F=0.45380; p=0.63712       |
| <i>LEPR</i> , rs1137101      | GG       | GA                 | AA                 |                   |                            |
|                              | F        | 18.31±10.74        | 17.44±11.04        | 23.93±19.57       | F=0.509; p=0.602           |
|                              | M        | 4.49±4.8           | 6.03±7.32          | 3.67±1.9          | F=0.60242; p=0.55038       |
| <i>FNDC5</i> , rs3480        | AA       | GA                 | AA                 |                   |                            |
|                              | F        | 17.64±8.82         | 19.21±13.04        | 15.34±5.8         | F=0.92780; p=0.39782       |
|                              | M        | 4.61±6.5           | 5.06±5.19          | 4.77±3.19         | F=0.05015; p=0.95113       |
| <i>FNDC5</i> , rs16835198    | GG       | TG                 | TT                 |                   |                            |
|                              | F        | 18.5±12.01         | 18.4±10.55         | 15.86±8.11        | F=0.40086; p=0.67050       |
|                              | M        | 6.02±7.01          | 4.34±4.72          | 3.89±3.41         | F=0.86918; p=0.42390       |
| <i>PTGS2</i> , rs689466      | TT       | TC                 | CC                 |                   |                            |
|                              | F        | 18.48±11.63        | 18.15±10.38        | 14.64±5.9         | F=0.39306; p=0.67572       |
|                              | M        | 3.86±4.44          | 6.58±6.93          | 4.43±4.02         | F=1.9693; p=0.14744        |
| <i>TRPV1</i> , rs150846      | GG       | GA                 | AA                 |                   |                            |
|                              | F        | 16.61±8.84         | 19.62±13.28        | 18.07±5.3         | F=1.2130; p=0.30039        |
|                              | M        | 4.39±4.61          | 5.45±6.67          | 5.38±1.48         | F=0.31406; p=0.73153       |
| <i>BDNF</i> , rs6265         | GG       | GA                 | AA                 |                   |                            |
|                              | <b>F</b> | <b>19.64±11.05</b> | <b>14.65±10.01</b> | <b>ND</b>         | <b>F=6.4003; p=0.01250</b> |
|                              | M        | 5.58±6             | 2.1±3.7            | 6.14±6.41         | F=1.7157; p=0.18753        |
| <i>CIDEA</i> , rs8092502     | CC       | TC                 | TT                 |                   |                            |
|                              | F        | 18.9±10.87         | 17.73±12.6         | 18.44±9.72        | F=0.08568; p=0.91794       |
|                              | M        | 2.97               | 5.09±4.89          | 4.82±5.79         | F=0.07504; p=0.92778       |
| <i>PPARGC1a</i> , rs12650562 | TT       | TC                 | CC                 |                   |                            |
|                              | F        | 15.12±9.92         | 18.57±11.37        | 18.5±10.84        | F=0.64929; p=0.52397       |
|                              | M        | 4.43±8.81          | 5.36±4.78          | 4.62±4.6          | F=0.17608; p=0.83893       |

F – females; M – males; ND – no data.

**Table S4.** ANOVA analysis of BMI, weight, and height depending on genotypes in the females with normal weight (n=144)

| Gene, SNP               | Mean±std.dev     |                  |             | F; p                     |
|-------------------------|------------------|------------------|-------------|--------------------------|
| <i>UCP1</i> , rs3811787 | TT               | TG               | GG          |                          |
| BMI                     | 21.7±1.62        | 21.3±1.53        | 21.33±1.84  | F=0.88198; p=0.41623     |
| Weight                  | 55.79±5.24       | 55.41±6.06       | 55.46±6.12  | F=0.05971; p=0.94206     |
| Higher                  | 160.33±5.75      | 161.16±6.26      | 161.18±5.96 | F=0.29205; p=0.74718     |
| <i>BDNF</i> , rs6265    | GG               | GA               | AA          |                          |
| <b>BMI</b>              | <b>21.57±1.6</b> | <b>21.02±1.6</b> | <b>ND</b>   | <b>F=3.67986; p=0.05</b> |
| Weight                  | 55.68±5.94       | 55.19±5.52       | ND          | F=0.20758; p=0.64937     |
| Higher                  | 160.47±5.77      | 162±6.56         | ND          | F=1.92866; p=0.16708     |

ND – no data.

**Table S5.** Prevalence of the T-allele of rs3811787 (*UCP1*) in eight East Asian populations living in different climatic zones

| Populations             | n   | Climatic zones | Prevalence of the T allele (CI) | Total prevalence of the T allele (CI) | p    |  |
|-------------------------|-----|----------------|---------------------------------|---------------------------------------|------|--|
| “North Asia”            |     |                |                                 |                                       |      |  |
| Northern Yakuts (N.YAK) | 16  | subarctic      | 0.72<br>(0.491-0.877)           | 0.63<br>(0.546-0.652)                 | 0.02 |  |
| Vilyuy Yakuts (V.YAK)   | 67  | temperate      | 0.55<br>(0.441-0.659)           |                                       |      |  |
| Central Yakuts (C.YAK)  | 198 | temperate      | 0.61<br>(0.542-0.667)           |                                       |      |  |
| “South Asia”            |     |                |                                 |                                       |      |  |
| Chinese (CHB)           | 103 | temperate      | 0.51<br>(0.421-0.598)           | 0.49<br>(0.448-0.529)                 |      |  |
| Japanese (JPT)          | 104 | subtropical    | 0.56<br>(0.473-0.648)           |                                       |      |  |
| Chinese (CHS)           | 105 | subtropical    | 0.49<br>(0.403-0.579)           |                                       |      |  |
| Chinese (CDX)           | 93  | subequatorial  | 0.46<br>(0.365-0.551)           |                                       |      |  |
| Vietnamese (KHV)        | 99  | subequatorial  | 0.41<br>(0.327-0.506)           |                                       |      |  |
| Total                   |     |                | n=785                           |                                       |      |  |

n – number of individuals; CI – confidence interval; *“North Asia”*: N.YAK – Northern Yakuts, V.YAK – Vilyuy Yakuts, C.YAK – Central Yakuts; *“South Asia”*: CHB – Han Chinese, JPT – Japanese, CHS – Southern Han Chinese, CDX – Chinese Dai, KHV – Vietnamese.

**Table S6.** Prevalence of the G-allele of rs6265 (*BDNF*) in eight East Asian populations living in different climatic zones

| Populations             | n   | Climatic zones | Prevalence of the G allele (CI) | Total prevalence of the G allele (CI) | p    |  |
|-------------------------|-----|----------------|---------------------------------|---------------------------------------|------|--|
| “North Asia”            |     |                |                                 |                                       |      |  |
| Northern Yakuts (N.YAK) | 16  | subarctic      | 0.84<br>(0.627-0.951)           | 0.83<br>(0.779-0.862)                 | 0.01 |  |
| Vilyuy Yakuts (V.YAK)   | 67  | temperate      | 0.84<br>(0.766-0.921)           |                                       |      |  |
| Central Yakuts (C.YAK)  | 198 | temperate      | 0.81<br>(0.756-0.857)           |                                       |      |  |
| “South Asia”            |     |                |                                 |                                       |      |  |
| Chinese (CHB)           | 103 | temperate      | 0.50<br>(0.407-0.584)           | 0.51<br>(0.471-0.552)                 |      |  |
| Japanese (JPT)          | 104 | subtropical    | 0.61<br>(0.521-0.694)           |                                       |      |  |
| Chinese (CHS)           | 105 | subtropical    | 0.47<br>(0.384-0.56)            |                                       |      |  |
| Chinese (CDX)           | 93  | subequatorial  | 0.52<br>(0.422-0.609)           |                                       |      |  |
| Vietnamese (KHV)        | 99  | subequatorial  | 0.46<br>(0.375-0.556)           |                                       |      |  |
| Total                   |     |                | n=785                           |                                       |      |  |

n – number of individuals; CI – confidence interval; "North Asia": N.YAK – Northern Yakuts, V.YAK – Vilyuy Yakuts, C.YAK - Central Yakuts; "South Asia": CHB – Han Chinese, JPT – Japanese, CHS – Southern Han Chinese, CDX – Chinese Dai, KHV – Vietnamese.

**Table S7.** List of primers sequences, annealing temperature and allelic profiles of the studied SNPs

| Gene     | Chromosomal region | SNP                    | Primer sequence                                                                   | Annealing temperature/<br>time, product size | Restriction enzymes, allele sizes (bp)        |
|----------|--------------------|------------------------|-----------------------------------------------------------------------------------|----------------------------------------------|-----------------------------------------------|
| UCP1     | 4q31.1             | rs1800592<br>-3826A>G  | F: 5'-ACATTTTGTGCAGCGATTCTG-3'<br>R: 5'-TTCACCACTTCTGACAGGCT-3'                   | 56°C/ 45 sec., 301 bp                        | <i>Ksp22I</i><br>A = 265+36<br>G = 301        |
|          |                    | rs3811787<br>-412A>C   | F: 5'-CCTTCTGTCACCCCTTTGGCTGCACACCTTCGCC-3'<br>R: 5'-TGACAAGTTCAGAGTGCTCTT-3'     | 57°C/ 45 sec., 296 bp                        | <i>Bst2UII</i><br>T = 262+34<br>G = 296       |
| UCP2     | 11q13.4            | rs659366<br>-866G>A    | F: 5'-AGCGTGACCTCACGCTCCTA-3'<br>R: 5'-GACTGAACGTCTTTGGGACTCCGT-3'                | 59°C/ 45 sec., 299 bp                        | <i>BspFNI</i><br>T = 178+121<br>C = 299       |
|          |                    | rs660339<br>Ala55Val   | F: 5'-TTGACAGAATCATACAGGCCGA-3'<br>R: 5'-TTGGAGCATCGAGATGACTG-3'                  | 53,8°C/ 45 sec., 392 bp                      | <i>Bst4CI</i><br>G = 392<br>A = 153+110       |
| UCP3     | 11q13.4            | rs1800849<br>-55C>T    | F: 5'-CCTTGTCACCAAGGAAGCGTCCACAGCTT-3'<br>R: 5'-CTTCTGGCTTGGCACTGGTCTTATACACCC-3' | 59°C/ 45 sec., 215 bp                        | <i>SmaI</i><br>C = 185+30<br>T = 215          |
|          |                    | rs2075577<br>Tyr210Tyr | F: 5'-GGGACTGGAACCCAAGTCT-3'<br>R: 5'-ACGACATCCTCAAGGAGAAGCTGCTGGAGTA-3'          | 58°C/ 45 sec., 249 bp                        | <i>RsaNI</i><br>G = 218+32<br>A = 249         |
| LEPR     | 1p31.3             | rs1137101<br>Gln223Arg | F: 5'-CAGTTTTCAGATGGTTCAGTGC-3'<br>R: 5'-TCTCTGACAAACATGAGCCTC-3'                 | 55°C/ 45 sec., 539 bp                        | <i>HpaII</i><br>A = 539<br>G = 409+130        |
| FNDC5    | 1p35.1             | rs16835198<br>G>T      | F: 5'-TTGCCTCATAGAAACACTCACCAGTCTG-3'<br>R: 5'-TAATCACCTAACACCTCAGGCAAGTGAATT-3'  | 57°C/ 45 sec., 203 bp                        | <i>EcoRI</i><br>G = 170+33<br>T = 203         |
|          |                    | rs3480<br>A>G          | F: 5'-CTCTGTAGACCGGAAGGAAGGGCCGGTCAATT-3'<br>R: 5'-GAGCAGCTCTGGCTATCAC-3'         | 55°C/ 45 sec., 424 bp                        | <i>Bsc4I</i><br>G = 380+34<br>A = 424         |
| PTGS2    | 1q31.1             | rs689466<br>-1195G>A   | F: 5'-ATGAGTTGTGACCATGGATCAA-3'<br>R: 5'-AAAAACCTCCAAGTGAGTCTCTT-3'               | 58°C/ 45 sec., 432 bp                        | <i>Bst4CI</i><br>T = 432<br>C = 295+137       |
| TRPV1    | 17p13.2            | rs150846<br>-6355A>C   | F: 5'-CACCTTTGAACTCGTTGTC-3'<br>R: 5'-GTCTGGGAGTAGGAGGGTGACTTTCTAGATCG-3'         | 57,5°C/ 45 sec., 424 bp                      | <i>BspFNI</i><br>G = 424<br>A = 392+32        |
| BDNF     | 11p14.1            | rs6265<br>Val66Met     | F: 5'-AGAAGAGGAGGCTCCAAAGG-3'<br>R: 5'-CCATTACGCTCTCCAGAGT-3'                     | 55°C/ 45 sec., 197 bp                        | <i>FaeI</i><br>C = 197<br>T = 122+75          |
| CIDEA    | 18p11.21           | rs8092502<br>C>T       | F: 5'-GCATCTCCCTTGTCAAAGA-3'<br>R: 5'-TGACTGCTGGTGGTTTGA-3'                       | 56,3°C/ 45 sec., 490 bp                      | <i>Sse9I</i><br>T = 237+163+90<br>C = 327+163 |
| PPARGC1A | 4p15.2             | rs12650562<br>C>T      | F: 5'-TTGAGTTCCAAGCTGATTCC-3'<br>R: 5'-TCCAATTCCTCAAGCTGTACGATGGCACAACG-3'        | 62°C/ 45 sec., 367 bp                        | <i>Bst4CI</i><br>C = 334+33<br>T = 367        |
